# Supplementary material for: Elevated T cell repertoire diversity is associated with progression of lung squamous cell premalignant lesions
Source: PubMed Central journal article supplement (PMC8477334; doi:10.1136/jitc-2021-002647), 2021-09-27
Supplement: jitc-2021-002647supp001.pdf [file jitc-2021-002647supp001.pdf]

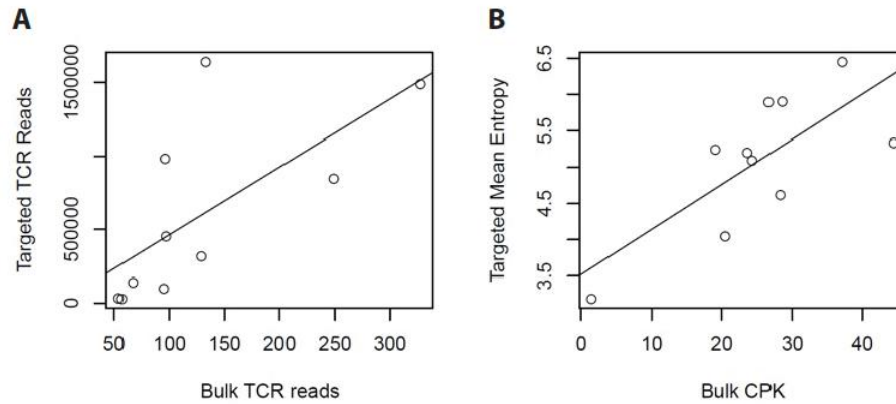

**Supplementary Figure 1. TCR diversity is correlated between metrics derived from bulk RNA sequencing data and targeted TCR data. (A.)** The number of total TCR reads correlated significantly between targeted (y-axis) and bulk RNA sequencing (x-axis) ( $\rho = 0.70$ ,  $p = 0.03$ ). **(B.)** The clonotypes per kiloread (CPK) metric derived from the bulk RNA sequencing data (x-axis) is significantly correlated with the targeted TCR-seq metric of entropy (y-axis) ( $\rho = 0.68$ ,  $p = 0.029$ ).

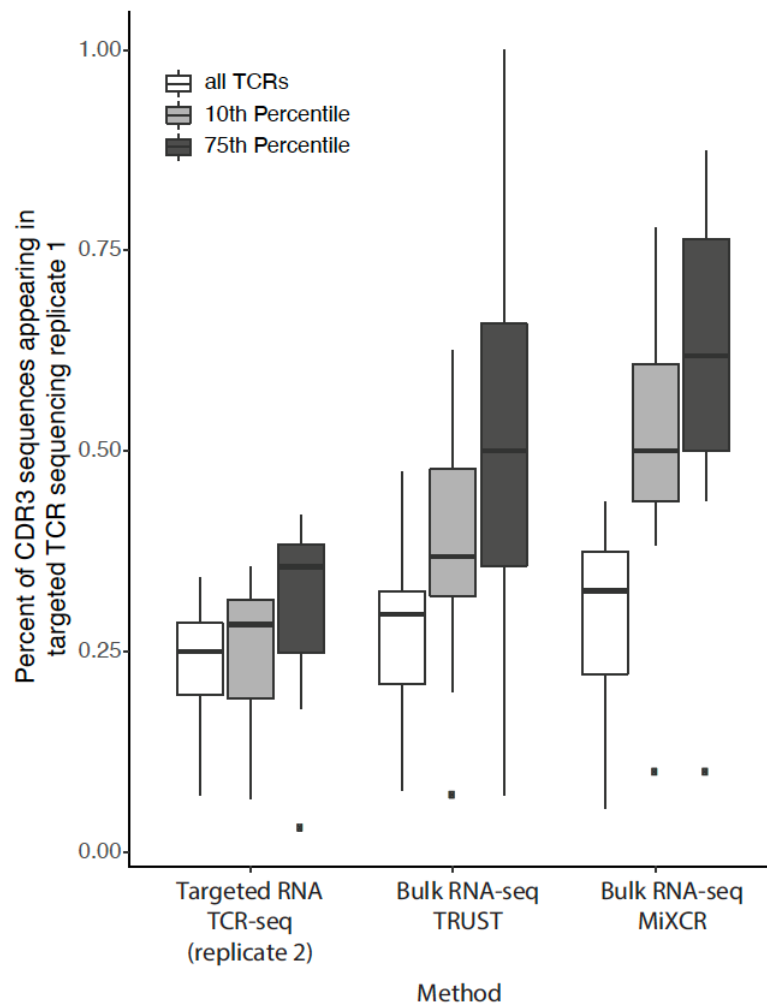

**Supplementary Figure 2. Shared CDR3 amino acid sequences from bulk RNA-seq assembled TCRs and targeted RNA TCR-seq TCRs.** The targeted RNA TCR sequencing generated data for 2 replicates per sample (n=11 samples). The boxplot shows the percent of CDR3 amino acid sequences from each method (Targeted RNA TCR-seq Replicate 2, Bulk RNA-seq TRUST, or Bulk RNA-seq MiXCR) that was also found in the targeted TCR-seq Replicate 1. Across all TCRs, no difference is found in the percent of CDR3 sequences from each group that appear in the replicate (Kruskal Wallance  $p > 0.1$ ). Percentages of shared CDR3 sequences were plotted for all TCR sequences (white boxes) or TCR sequences in at least the 10<sup>th</sup> (gray boxes) or 75<sup>th</sup> (dark gray boxes) percentiles of abundance for each sample in each method. When applying increasing thresholds of TCR abundance, all methods showed increased agreement with the TCR-seq replicate.

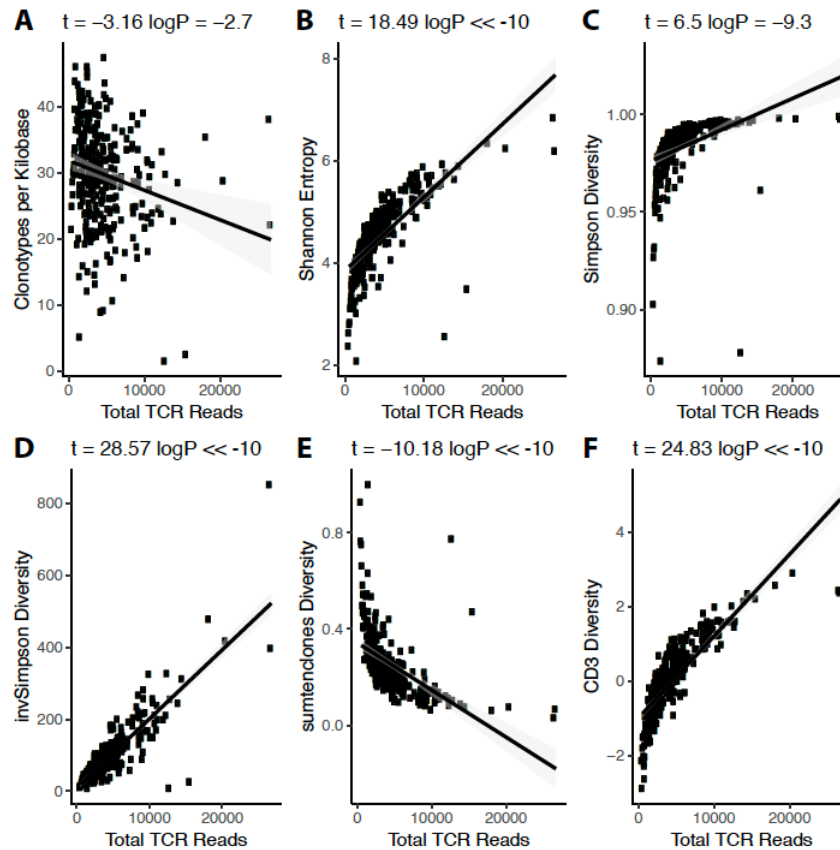

**Supplementary Figure 3. Diversity metrics correlated with total number of TCR reads.** The plots show the correlation between total TCR reads and diversity metrics and T cell gene expression. The plots are as follows: **(A.)** clonotypes per kilobase (CPK), **(B.)** Shannon entropy, **(C.)** Simpson diversity, **(D.)** inverse Simpson diversity, **(E.)** log<sub>10</sub> sum of the top 10 clones, and **(F.)** CD3 gene expression. Clonotypes per kilobase (CPK) was the diversity metric that demonstrated the weakest correlation to total TCR reads. The correlation between metrics was derived using a linear mixed effects model adjusting for patient as a random effect and the t-statistic and log<sub>10</sub> p-value are listed for each graph.

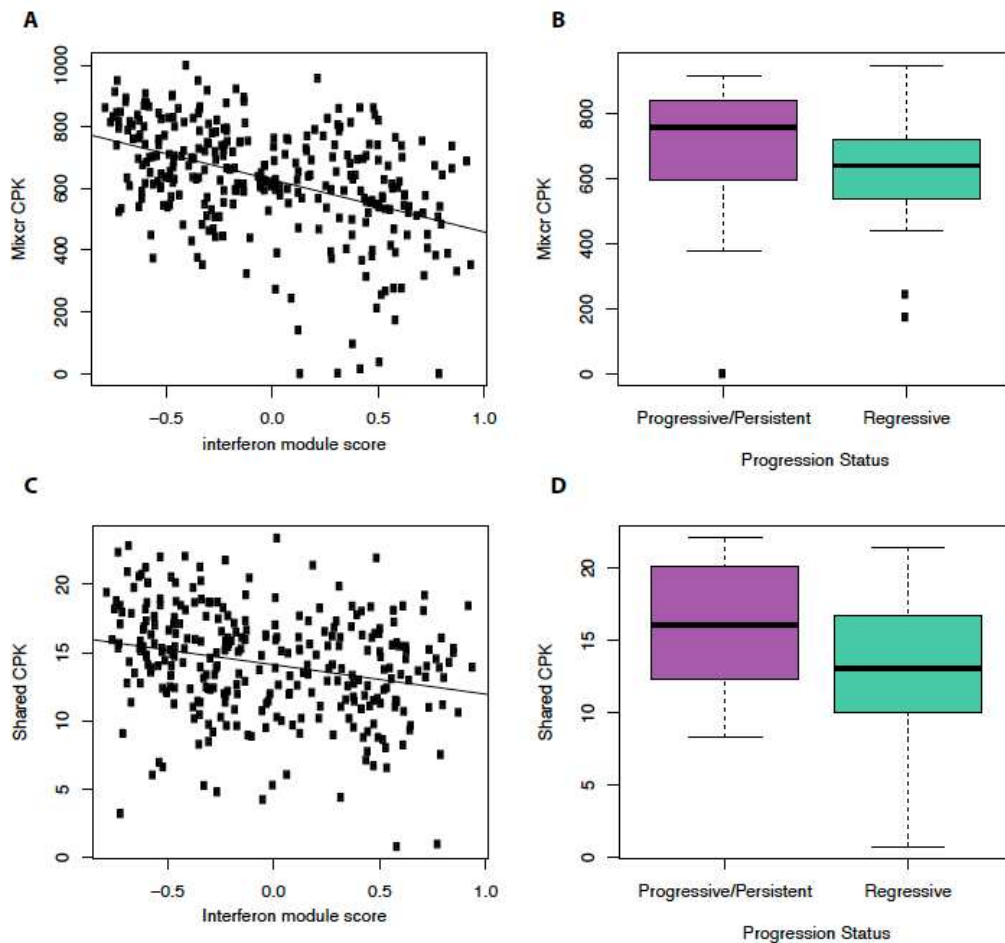

**Supplementary Figure 4. TCR clonality is associated with immune processes and premalignant lesion outcome regardless of method used to assemble TCR sequences.** We used the MiXCR sequences (A.+B.) or the shared TCR sequences found by MiXCR and TRUST (C.+D.) to compute Clonotypes per Kilo-read (CPK) and correlate this metric with immune processes and premalignant lesion outcome. (A.+ C.) Clonotypes per Kilo-read (CPK) is negatively correlated with a gene expression module of interferon response previously shown to be negatively associated with lesion progression: (A.)  $p = 7.6e-15$  and (D.)  $p=2.2e-6$ . (B.+D.) Clonotypes per kilo-read (CPK) in *Proliferative* lesions, by progression status (progressive/persistent lesions, purple; regressive lesions, turquoise). Progressive lesions have significantly higher CPK than regressing lesions ( $n=22$  progressive/persistent and  $n=28$  regressive samples,  $n=23$  patients): (B.)  $p=0.04$  and (D.)  $p=0.025$ .



| PCGA ID                                 | Chain | Total Reads | Unique CDR3 Reads |
|-----------------------------------------|-------|-------------|-------------------|
| PCGA-01-0001-037-19118-00482BX-1007555R | TRA   | 35743       | 230               |
| PCGA-01-0001-037-19118-00482BX-1007555R | TRA   | 33153       | 234               |
| PCGA-01-0001-037-19118-00482BX-1007555R | TRB   | 12548       | 119               |
| PCGA-01-0001-037-19118-00482BX-1007555R | TRB   | 11306       | 123               |
| PCGA-01-0001-037-19118-00482BX-1007555R | TRD   | 734         | 10                |
| PCGA-01-0001-037-19118-00482BX-1007555R | TRD   | 394         | 4                 |
| PCGA-01-0001-037-19118-00482BX-1007555R | TRG   | 3642        | 28                |
| PCGA-01-0001-037-19118-00482BX-1007555R | TRG   | 2149        | 24                |
| PCGA-01-0001-037-19762-00898BX-1007486R | TRA   | 470869      | 740               |
| PCGA-01-0001-037-19762-00898BX-1007486R | TRA   | 461677      | 746               |
| PCGA-01-0001-037-19762-00898BX-1007486R | TRB   | 147864      | 389               |
| PCGA-01-0001-037-19762-00898BX-1007486R | TRB   | 170537      | 444               |
| PCGA-01-0001-037-19762-00898BX-1007486R | TRD   | 31061       | 92                |
| PCGA-01-0001-037-19762-00898BX-1007486R | TRD   | 40305       | 97                |
| PCGA-01-0001-037-19762-00898BX-1007486R | TRG   | 81779       | 112               |
| PCGA-01-0001-037-19762-00898BX-1007486R | TRG   | 85331       | 152               |
| PCGA-01-0001-037-20126-01120BX-1031613R | TRA   | 124142      | 446               |
| PCGA-01-0001-037-20126-01120BX-1031613R | TRA   | 110040      | 421               |
| PCGA-01-0001-037-20126-01120BX-1031613R | TRB   | 69057       | 362               |
| PCGA-01-0001-037-20126-01120BX-1031613R | TRB   | 58152       | 348               |
| PCGA-01-0001-037-20126-01120BX-1031613R | TRD   | 7978        | 44                |
| PCGA-01-0001-037-20126-01120BX-1031613R | TRD   | 7768        | 54                |
| PCGA-01-0001-037-20126-01120BX-1031613R | TRG   | 11734       | 65                |
| PCGA-01-0001-037-20126-01120BX-1031613R | TRG   | 11553       | 65                |
| PCGA-01-0001-070-19300-00587BX-1007583R | TRA   | 125474      | 244               |
| PCGA-01-0001-070-19300-00587BX-1007583R | TRA   | 136958      | 239               |
| PCGA-01-0001-070-19300-00587BX-1007583R | TRB   | 66573       | 209               |
| PCGA-01-0001-070-19300-00587BX-1007583R | TRB   | 40470       | 117               |
| PCGA-01-0001-070-19300-00587BX-1007583R | TRD   | 21009       | 56                |
| PCGA-01-0001-070-19300-00587BX-1007583R | TRD   | 12532       | 50                |
| PCGA-01-0001-070-19300-00587BX-1007583R | TRG   | 22739       | 66                |
| PCGA-01-0001-070-19300-00587BX-1007583R | TRG   | 28001       | 39                |
| PCGA-01-0001-089-20126-01118BX-1031611R | TRA   | 263802      | 486               |
| PCGA-01-0001-089-20126-01118BX-1031611R | TRA   | 245170      | 538               |
| PCGA-01-0001-089-20126-01118BX-1031611R | TRB   | 119886      | 433               |
| PCGA-01-0001-089-20126-01118BX-1031611R | TRB   | 90949       | 361               |
| PCGA-01-0001-089-20126-01118BX-1031611R | TRD   | 30969       | 76                |
| PCGA-01-0001-089-20126-01118BX-1031611R | TRD   | 39131       | 109               |
| PCGA-01-0001-089-20126-01118BX-1031611R | TRG   | 21206       | 64                |
| PCGA-01-0001-089-20126-01118BX-1031611R | TRG   | 39372       | 95                |
| PCGA-01-0021-025-20449-01091BX-1031600R | TRA   | 7903        | 114               |
| PCGA-01-0021-025-20449-01091BX-1031600R | TRA   | 8879        | 131               |
| PCGA-01-0021-025-20449-01091BX-1031600R | TRB   | 5379        | 89                |
| PCGA-01-0021-025-20449-01091BX-1031600R | TRB   | 5127        | 85                |
| PCGA-01-0021-025-20449-01091BX-1031600R | TRD   | 178         | 3                 |
| PCGA-01-0021-025-20449-01091BX-1031600R | TRD   | 73          | 2                 |
| PCGA-01-0021-025-20449-01091BX-1031600R | TRG   | 648         | 17                |
| PCGA-01-0021-025-20449-01091BX-1031600R | TRG   | 889         | 21                |
| PCGA-01-0021-050-19434-00465BX-1007550R | TRA   | 103665      | 467               |
| PCGA-01-0021-050-19434-00465BX-1007550R | TRA   | 97156       | 523               |
| PCGA-01-0021-050-19434-00465BX-1007550R | TRB   | 48015       | 265               |
| PCGA-01-0021-050-19434-00465BX-1007550R | TRB   | 40966       | 268               |
| PCGA-01-0021-050-19434-00465BX-1007550R | TRD   | 4168        | 37                |
| PCGA-01-0021-050-19434-00465BX-1007550R | TRD   | 1700        | 17                |
| PCGA-01-0021-050-19434-00465BX-1007550R | TRG   | 15009       | 77                |
| PCGA-01-0021-050-19434-00465BX-1007550R | TRG   | 8311        | 62                |
| PCGA-01-0021-070-20449-01089BX-1031598R | TRA   | 361340      | 505               |
| PCGA-01-0021-070-20449-01089BX-1031598R | TRA   | 569838      | 595               |
| PCGA-01-0021-070-20449-01089BX-1031598R | TRB   | 304895      | 630               |
| PCGA-01-0021-070-20449-01089BX-1031598R | TRB   | 332628      | 474               |
| PCGA-01-0021-070-20449-01089BX-1031598R | TRD   | 10354       | 28                |
| PCGA-01-0021-070-20449-01089BX-1031598R | TRD   | 28781       | 37                |
| PCGA-01-0021-070-20449-01089BX-1031598R | TRG   | 25702       | 48                |
| PCGA-01-0021-070-20449-01089BX-1031598R | TRG   | 8122        | 25                |
| PCGA-01-0042-010-23911-01028BX-1033960R | TRA   | 217964      | 309               |
| PCGA-01-0042-010-23911-01028BX-1033960R | TRA   | 304970      | 543               |
| PCGA-01-0042-010-23911-01028BX-1033960R | TRB   | 219443      | 599               |
| PCGA-01-0042-010-23911-01028BX-1033960R | TRB   | 174843      | 625               |
| PCGA-01-0042-010-23911-01028BX-1033960R | TRD   | 1297        | 12                |
| PCGA-01-0042-010-23911-01028BX-1033960R | TRG   | 32978       | 101               |
| PCGA-01-0042-010-23911-01028BX-1033960R | TRG   | 31082       | 85                |
| PCGA-01-0042-048-23680-00907BX-1033955R | TRA   | 9401        | 277               |
| PCGA-01-0042-048-23680-00907BX-1033955R | TRA   | 9178        | 290               |
| PCGA-01-0042-048-23680-00907BX-1033955R | TRB   | 7906        | 322               |
| PCGA-01-0042-048-23680-00907BX-1033955R | TRB   | 6621        | 330               |
| PCGA-01-0042-048-23680-00907BX-1033955R | TRD   | 15          | 3                 |
| PCGA-01-0042-048-23680-00907BX-1033955R | TRD   | 34          | 8                 |
| PCGA-01-0042-048-23680-00907BX-1033955R | TRG   | 877         | 32                |
| PCGA-01-0042-048-23680-00907BX-1033955R | TRG   | 760         | 23                |
| PCGA-01-0042-048-23911-01029BX-1034033R | TRA   | 39007       | 237               |
| PCGA-01-0042-048-23911-01029BX-1034033R | TRA   | 42164       | 293               |
| PCGA-01-0042-048-23911-01029BX-1034033R | TRB   | 27234       | 259               |
| PCGA-01-0042-048-23911-01029BX-1034033R | TRB   | 24916       | 302               |
| PCGA-01-0042-048-23911-01029BX-1034033R | TRD   | 92          | 3                 |
| PCGA-01-0042-048-23911-01029BX-1034033R | TRD   | 106         | 1                 |
| PCGA-01-0042-048-23911-01029BX-1034033R | TRG   | 3262        | 38                |
| PCGA-01-0042-048-23911-01029BX-1034033R | TRG   | 3848        | 53                |

**Supplementary Table 1. Samples that underwent targeted RNA TCR sequencing.** For each sample, the chain sequenced, the total number of reads sequenced, and the number of unique CDR3 reads are listed.

| ID                                      | Expanded Clones |         |          |         |         |         |         |         |         |          |
|-----------------------------------------|-----------------|---------|----------|---------|---------|---------|---------|---------|---------|----------|
|                                         | CASSPLKD        | CQQYHD  | CASSLAPP | CASSLAG | CASSLAG | CASSQLT | CASSLGS | CASSSQG | CALWEPI | CASSVEEG |
|                                         | GELFF           | WSLYTF  | GSNQPH   | SYNEQFF | TGEAFF  | GYTGELF | YEQYF   | WYSYEQY | YKLF    | GYGYTF   |
| PCGA-01-0001-037-19300-00589BX-1007585R | FALSE           | FALSE   | FALSE    | FALSE   | TRUE    | FALSE   | FALSE   | FALSE   | FALSE   | FALSE    |
| PCGA-01-0001-037-19762-00898BX-1007486R | FALSE           | FALSE   | FALSE    | FALSE   | TRUE    | FALSE   | FALSE   | FALSE   | FALSE   | FALSE    |
| PCGA-01-0001-076-20343-01314BX-1031646R | FALSE           | FALSE   | FALSE    | FALSE   | TRUE    | FALSE   | FALSE   | FALSE   | FALSE   | FALSE    |
| PCGA-01-0001-077-20126-01115BX-1031608R | FALSE           | FALSE   | FALSE    | FALSE   | TRUE    | FALSE   | FALSE   | FALSE   | FALSE   | FALSE    |
| PCGA-01-0012-050-21836-01253BX-1031633R | FALSE           | FALSE   | FALSE    | FALSE   | FALSE   | FALSE   | TRUE    | FALSE   | FALSE   | FALSE    |
| PCGA-01-0015-011-16541-00571BX-1007578R | FALSE           | FALSE   | FALSE    | FALSE   | FALSE   | TRUE    | FALSE   | FALSE   | FALSE   | FALSE    |
| PCGA-01-0015-011-17129-00932BX-1031579R | FALSE           | FALSE   | FALSE    | FALSE   | FALSE   | TRUE    | FALSE   | FALSE   | FALSE   | FALSE    |
| PCGA-01-0015-025-16954-00864BX-1007478R | FALSE           | FALSE   | FALSE    | FALSE   | FALSE   | TRUE    | FALSE   | FALSE   | FALSE   | FALSE    |
| PCGA-01-0029-050-22090-00380BX-1007537R | FALSE           | FALSE   | FALSE    | FALSE   | FALSE   | FALSE   | TRUE    | TRUE    | TRUE    | TRUE     |
| PCGA-01-0029-050-22678-00816BX-1007451R | FALSE           | FALSE   | FALSE    | FALSE   | FALSE   | FALSE   | TRUE    | TRUE    | TRUE    | TRUE     |
| PCGA-01-0029-061-22090-00378BX-1007535R | FALSE           | FALSE   | FALSE    | FALSE   | FALSE   | FALSE   | TRUE    | FALSE   | FALSE   | FALSE    |
| PCGA-01-0029-089-22090-00377BX-1007534R | FALSE           | FALSE   | FALSE    | FALSE   | FALSE   | FALSE   | FALSE   | FALSE   | FALSE   | TRUE     |
| PCGA-01-0031-053-24726-01061BX-1031594R | FALSE           | FALSE   | FALSE    | TRUE    | FALSE   | FALSE   | FALSE   | FALSE   | FALSE   | FALSE    |
| PCGA-01-0031-074-24285-00854BX-1007472R | FALSE           | FALSE   | TRUE     | TRUE    | FALSE   | FALSE   | FALSE   | FALSE   | FALSE   | FALSE    |
| PCGA-01-0031-074-24726-01060BX-1031593R | FALSE           | FALSE   | TRUE     | TRUE    | FALSE   | FALSE   | FALSE   | FALSE   | FALSE   | FALSE    |
| PCGA-01-0044-048-17646-44967BX-1033975R | FALSE           | TRUE    | FALSE    | FALSE   | FALSE   | FALSE   | FALSE   | FALSE   | FALSE   | FALSE    |
| PCGA-01-0044-048-17898-01132BX-1034080R | FALSE           | TRUE    | FALSE    | FALSE   | FALSE   | FALSE   | FALSE   | FALSE   | FALSE   | FALSE    |
| PCGA-01-0044-050-17898-01133BX-1034071R | TRUE            | FALSE   | FALSE    | FALSE   | FALSE   | FALSE   | FALSE   | FALSE   | FALSE   | FALSE    |
| PCGA-01-0044-070-17646-44965BX-1033993R | TRUE            | FALSE   | FALSE    | FALSE   | FALSE   | FALSE   | FALSE   | FALSE   | FALSE   | FALSE    |
| PCGA-01-0044-070-17898-01130BX-1034098R | FALSE           | TRUE    | FALSE    | FALSE   | FALSE   | FALSE   | FALSE   | FALSE   | FALSE   | FALSE    |
| PCGA-01-0044-089-17646-44966BX-1033984R | TRUE            | FALSE   | FALSE    | FALSE   | FALSE   | FALSE   | FALSE   | FALSE   | FALSE   | FALSE    |
| PCGA-01-0044-089-17898-01131BX-1034089R | TRUE            | FALSE   | FALSE    | FALSE   | FALSE   | FALSE   | FALSE   | FALSE   | FALSE   | FALSE    |
| Public/Private TCR                      | Private         | Private | Private  | Private | Private | Private | Public  | Private | Private | Private  |
| Number Time Points                      | 2               | 2       | 2        | 2       | 4       | 3       | 3       | 2       | 2       | 2        |
| Number of Locations                     | 3               | 2       | 1        | 1       | 3       | 2       | 2       | 1       | 1       | 2        |
| Number of Time Points/Locations         | 2               | 2       | 2        | 2       | 2       | 2       | 2       | 2       | 2       | 2        |
| Number of Patients                      | 1               | 1       | 1        | 1       | 1       | 1       | 2       | 1       | 1       | 1        |

**Supplementary Table 2. Expanded TCR clones at multiple time points within the same lesion location.** For each expanded clone (columns), the samples (rows) are marked as TRUE if the clone was present or FALSE if it was absent. The clones are classified as private (found only in the sample from a single patient) versus public (found in multiple patients) and summarized by the number of time points, locations, or unique locations across time that each expanded clone is present in.



| ID                                      | Sample Characteristics |                    |                    |                                      |                           |             |                |                                     |                                  |                   |                               |                        |                                 |   |
|-----------------------------------------|------------------------|--------------------|--------------------|--------------------------------------|---------------------------|-------------|----------------|-------------------------------------|----------------------------------|-------------------|-------------------------------|------------------------|---------------------------------|---|
|                                         | Patient                | Lung Location Code | Lung Location Name | Lung Location Description            | Time of Sample Collection | Histology   | Histology Code | Complete Previous Histology at Site | Complete Later Histology at Site | Molecular Subtype | Progression/Regression Status | Genomic Smoking Status | Previous History of Lung Cancer |   |
| PCGA-01-0001-037-19300-005898X-1007585R | 1                      | 37                 | LGLO               | Lingula Orifice or opening           | 19300                     | Normal      |                | 4 25                                | 1,22.3,22.3                      | Secretory         | Normal/Stable                 | Current                | N                               |   |
| PCGA-01-0001-037-19762-008988X-1007486R | 1                      | 37                 | LGLO               | Lingula Orifice or opening           | 19762                     | Normal      |                | 1 25,4                              | 22.3,22.3                        | Secretory         | Normal/Stable                 | Current                | N                               |   |
| PCGA-01-0001-076-20343-013148X-1031646R | 1                      | 76                 | RB8                | RLL Anterior Basal Seg (ABS)         | 20343                     | Normal      |                | 4 25,24                             |                                  | Normal            | UNK                           | Current                | N                               |   |
| PCGA-01-0001-077-20126-011158X-1031608R | 1                      | 77                 | RB8/9              | RLL ABS Carina between RB8 and RB9   | 20126                     | Hyperplasia |                | 22.3                                | 1                                | Secretory         | UNK                           | Current                | N                               |   |
| PCGA-01-0012-050-21836-012538X-1031633R | 12                     | 50                 | MC                 | Main Carina, Carina NOS              | 21836                     | Hyperplasia |                | 22.3 22.5                           | 22.3                             | Inflammatory      | Normal/Stable                 | Former                 | Y                               |   |
| PCGA-01-0015-011-16541-005718X-1007578R | 15                     | 11                 | LB1/2              | LUL APS Carina between LB1 and LB2   | 16541                     | ModD        |                | 25                                  | 25 24,26                         | Secretory         | Progressive/Persistent        | Current                | Y                               |   |
| PCGA-01-0015-011-17129-009328X-1031579R | 15                     | 11                 | LB1/2              | LUL APS Carina between LB1 and LB2   | 17129                     | MildD       |                | 24 25,25                            | 26                               | Inflammatory      | Progressive/Persistent        | Former                 | Y                               |   |
| PCGA-01-0015-025-16954-008648X-1007478R | 15                     | 25                 | LB6                | LLL Superior Segment (SS)            | 16954                     | Metaplasia  |                | 23 25,24                            | 24                               | Inflammatory      | Progressive/Persistent        | Current                | Y                               |   |
| PCGA-01-0029-050-22090-003808X-1007537R | 29                     | 50                 | MC                 | Main Carina, Carina NOS              | 22090                     | ModD        |                | 25 22.3,24                          | NA,23                            | Proliferative     | Regressive                    | Current                | Y                               |   |
| PCGA-01-0029-050-22678-008168X-1007451R | 29                     | 50                 | MC                 | Main Carina, Carina NOS              | 22678                     | Metaplasia  |                | 23 22.3,24,25,NA                    |                                  | Secretory         | UNK                           | Current                | Y                               |   |
| PCGA-01-0029-061-22090-003788X-1007535R | 29                     | 61                 | RB2/3              | RUL Carina between RB2 and RB3       | 22090                     | ModD        |                | 25 1.5,26                           | 25,24                            | Secretory         | Progressive/Persistent        | Current                | Y                               |   |
| PCGA-01-0029-089-22090-003778X-1007534R | 29                     | 89                 | RMLO               | Right Middle Lobe Orifice or opening | 22090                     | MildD       |                | 24 23,26,26                         | 23                               | Secretory         | Regressive                    | Current                | Y                               |   |
| PCGA-01-0031-053-24726-010618X-1031594R | 31                     | 53                 | RB1/2              | RUL Carina between RB1 and RB2       | 24726                     | Hyperplasia |                | 22.4 25,23                          | 22.3,0                           | Proliferative     | Normal/Stable                 | Current                | N                               |   |
| PCGA-01-0031-074-24285-008548X-1007472R | 31                     | 74                 | RB7                | RLL Medial Basal Segment (MBS)       | 24285                     | Hyperplasia |                | 22.3                                | 22.4,22.4                        | Inflammatory      | Normal/Stable                 | Current                | N                               |   |
| PCGA-01-0031-074-24726-010608X-1031593R | 31                     | 74                 | RB7                | RLL Medial Basal Segment (MBS)       | 24726                     | Hyperplasia |                | 22.4 22.3                           | 22.4                             | Inflammatory      | Normal/Stable                 | Current                | N                               |   |
| PCGA-01-0044-048-17646-449678X-1033975R | 44                     | 48                 | LULO               | Left Upper Lobe Orifice or opening   | 17646                     | Hyperplasia |                | 22.3                                |                                  | 4                 | Inflammatory                  | Normal/Stable          | Former                          | N |
| PCGA-01-0044-048-17898-011328X-1034080R | 44                     | 48                 | LULO               | Left Upper Lobe Orifice or opening   | 17898                     | Normal      |                | 4                                   | 22.3                             |                   | Inflammatory                  | UNK                    | Former                          | N |
| PCGA-01-0044-050-17898-011338X-1034071R | 44                     | 50                 | MC                 | Main Carina, Carina NOS              | 17898                     | ModD        |                | 25 23,25                            | 23                               | Proliferative     | Regressive                    | Former                 | N                               |   |
| PCGA-01-0044-070-17646-449658X-1033993R | 44                     | 70                 | RB6                | RLL Superior Basal Segment (SBS)     | 17646                     | Hyperplasia |                | 22.3                                | 4 22.3,4                         | Secretory         | Normal/Stable                 | Former                 | N                               |   |
| PCGA-01-0044-070-17898-011308X-1034098R | 44                     | 70                 | RB6                | RLL Superior Basal Segment (SBS)     | 17898                     | Hyperplasia |                | 22.3 4,22.3                         | 4                                | Inflammatory      | Normal/Stable                 | Former                 | N                               |   |
| PCGA-01-0044-089-17646-449668X-1033984R | 44                     | 89                 | RMLO               | Right Middle Lobe Orifice or opening | 17646                     | Hyperplasia |                | 22.3                                | 22.3,22.3                        | Secretory         | Normal/Stable                 | Former                 | N                               |   |
| PCGA-01-0044-089-17898-011318X-1034089R | 44                     | 89                 | RMLO               | Right Middle Lobe Orifice or opening | 17898                     | Hyperplasia |                | 22.3                                | 22.3                             | 22.3              | Secretory                     | Normal/Stable          | Former                          | N |

**Supplementary Table 3. Phenotypic data across the samples where expanded TCR clones are present.** For each sample ID the following characteristics are listed: Patient ID, location code for the sample, location name, location description, time of collection, histology (MildD = mild dysplasia, ModD = moderate dysplasia, SevD = severe dysplasia), histology code, histology code(s) for lesions sampled in the past from that location, histology code(s) for lesions sampled in the future from that location, molecular subtype, progression/regression status, genomic smoking status, and prior history of lung cancer. Histology codes are as follow: normal (<22),

hyperplasia ( $\geq 22$  and  $< 23$ ), metaplasia (23), mild dysplasia (24), moderate dysplasia (25), severe dysplasia (26), and unknown histology/insufficient material (NA).
